# Supplementary material
Source: publisher figshare collection journal article supplement (https://tandf.figshare.com/ndownloader/files/25732350)
Supplement: Supplementary file 1 [file 25732350]

**Figure S1.** Typical thrombin generation profile overtime for 60 min at 1-min intervals [nM] in the presence of low concentration (RC Low); high concentration (RC high) of phospholipid micelles containing recombinant human tissue factor and CaCl2. Abbreviation: frozen-thawed platelet lysate (FTPL), serum converted platelet lysate (SCPL), heated serum converted platelet lysate (HSCPL), platelet pellet lysate (PPL), heated platelet pellet lysate (HPPL).
